# Supplementary material for: Doping-induced structural evolution from rutile to anatase: formation of Nb-doped anatase TiO2nanosheets with high photocatalytic activity
Source: Royal Society of Chemistry journal article supplement (doi:10.1039/c5ta08202a), 2015-10-30
Supplement: c5ta08202a1.pdf [file c5ta08202a1.pdf]

## Supporting Information

# Doping-Induced Structural Evolution from Rutile to Anatase: Formation of Nb-Doped Anatase TiO<sub>2</sub> Nanosheets with High Photocatalytic Activity

Hsin-Yi Wang,<sup>§a</sup> Jiazang Chen,<sup>§a</sup> Fang-Xing Xiao,<sup>a</sup> Jianwei Zheng,<sup>b</sup> and Bin Liu<sup>\*a</sup>

<sup>a</sup>School of Chemical and Biomedical Engineering, Nanyang Technological University, 62 Nanyang Drive,  
Singapore 637459, Singapore

<sup>b</sup>Institute of High Performance Computing, Agency for Science, Technology and Research, 1  
Fusionopolis Way, #16-16 Connexis, Singapore 138632, Singapore

<sup>§</sup> These authors contributed equally to this work.

Email: [liubin@ntu.edu.sg](mailto:liubin@ntu.edu.sg)

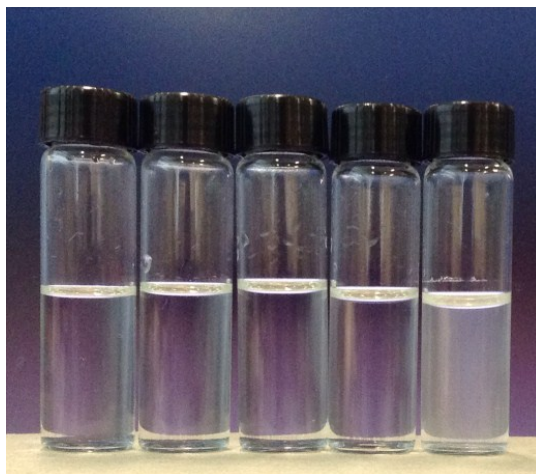

**Figure SI-1.** Stability characteristics of the hydroxo-aquo ions of titanium precursors in high acidic solution (6 M HCl). The five bottles from left to right contain the solutions hydrothermally treated at room temperature, 50 °C, 80 °C, 100 °C, and 120 °C for 6 hours, respectively. In this photograph, it is clear to see that titanium precursors are stable in acidic solution at low temperature (< 100 °C); while they become unstable once temperature increases (> 100 °C).

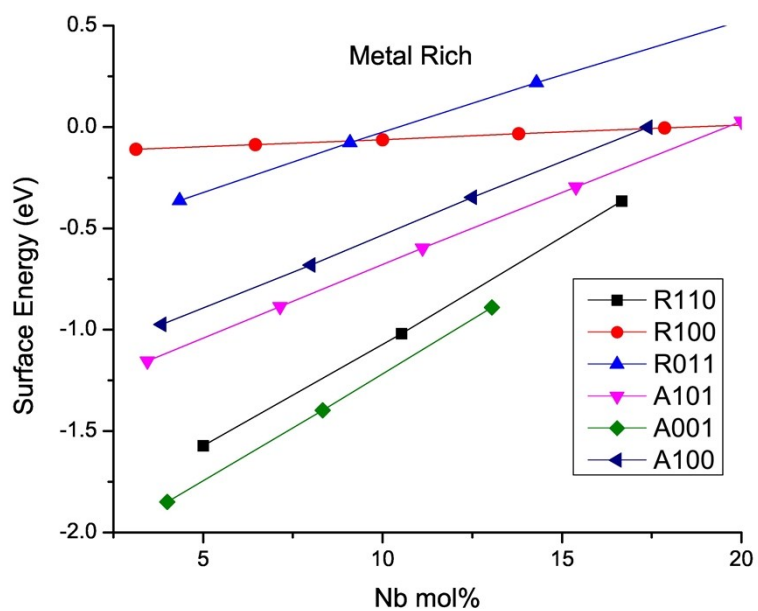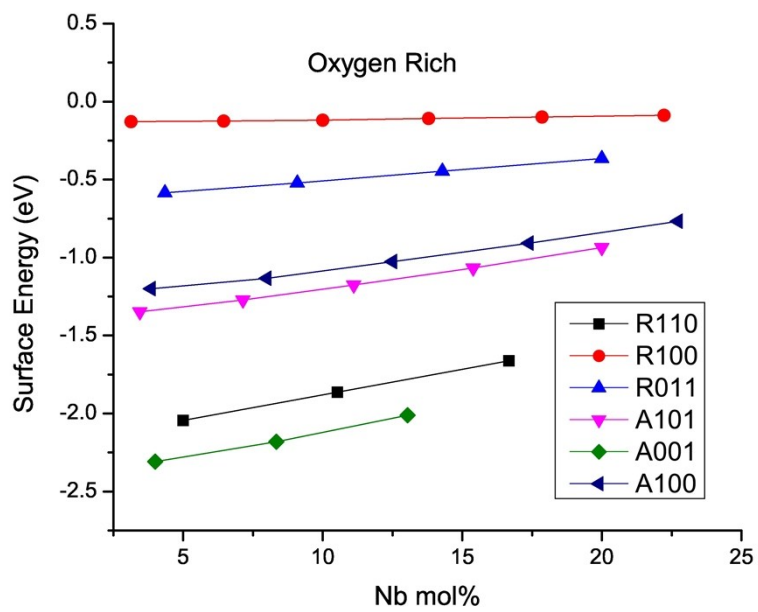

**Figure SI-2.** Surface free energy simulation on different TiO<sub>2</sub> facets.

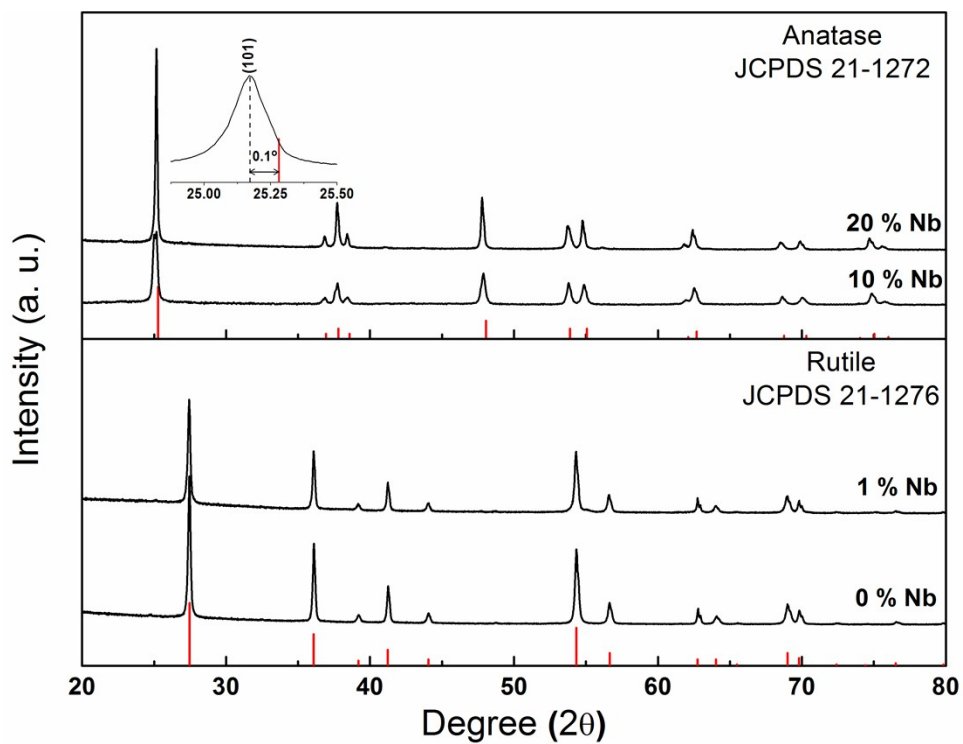

**Figure SI-3.** Crystalline information of Nb-doped TiO<sub>2</sub>. XRD patterns of TiO<sub>2</sub> nanostructures doped with 0 % Nb, 1 % Nb, 10 % Nb, and 20 % Nb. From which, it is clear to see the phase of TiO<sub>2</sub> crystals evolve from rutile to anatase.

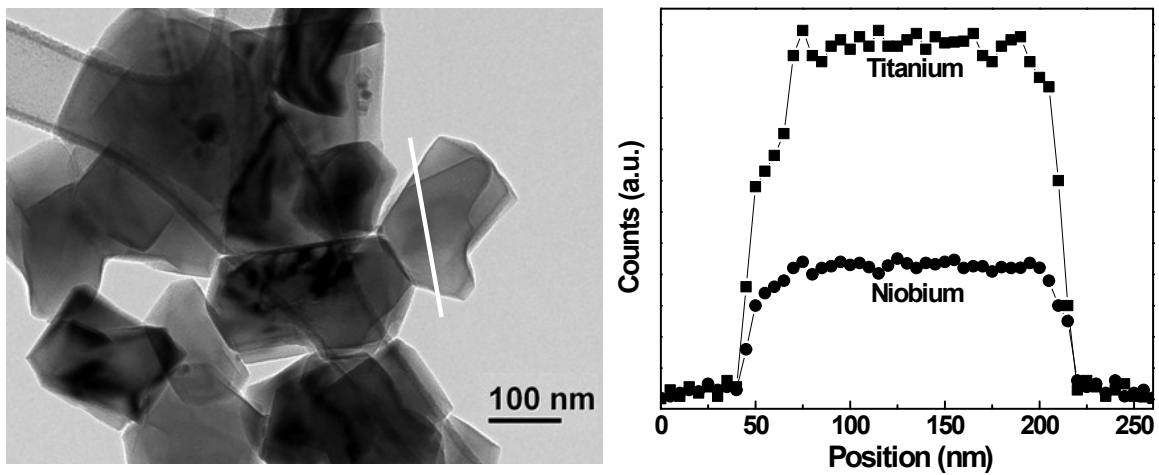

**Figure SI-4.** Elemental distribution of anatase Nb (10 %)-TiO<sub>2</sub>. TEM image of anatase Nb (10 %)-TiO<sub>2</sub> multifaceted nanoparticles and the corresponding energy dispersive spectroscopy element line-scan profiles across an individual nanoparticle.

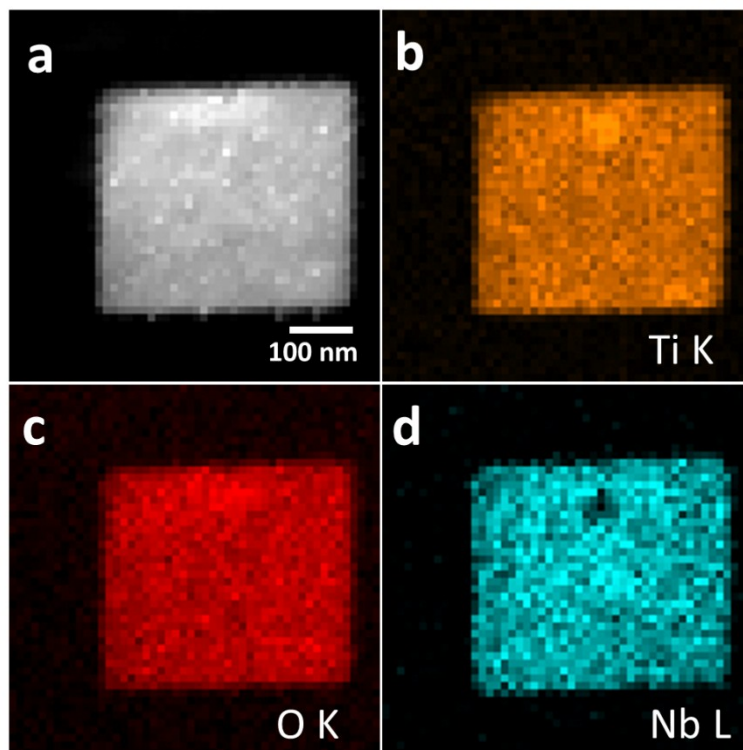

**Figure SI-5.** Elemental distribution of Nb (20 %) TiO<sub>2</sub>. a) STEM image of a single anatase Nb (20 %)-TiO<sub>2</sub> nanosheet. EELS mapping images of b) titanium, c) oxygen, and d) niobium elements.

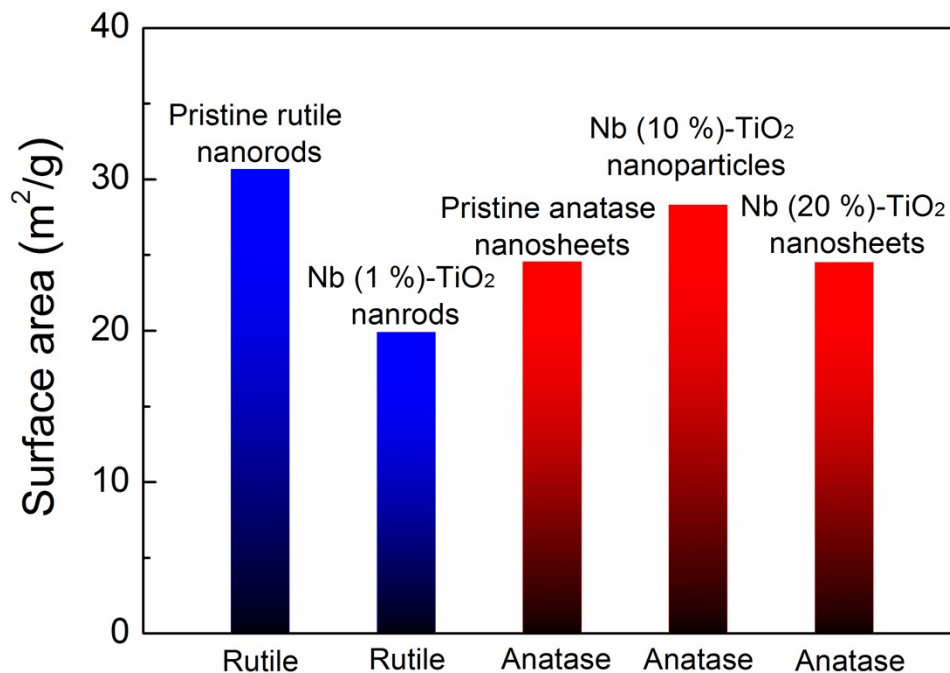

**Figure SI-6.** Specific surface area of pristine rutile nanorods, Nb (1 %)-TiO<sub>2</sub> nanorods, pristine anatase nanosheets, Nb (10 %)-TiO<sub>2</sub> nanoparticles, and Nb (20 %)-TiO<sub>2</sub> nanosheets.

**Note:** After doping 1 % Nb, the Nb (1 %)-TiO<sub>2</sub> nanorods become shorter and thicker as compared to the pristine rutile nanorods. Therefore, the specific surface area decreases a little bit. However, after introducing 10 % and 20 % Nb, the specific surface area of Nb (10 %)-TiO<sub>2</sub> nanoparticles and Nb (20 %)-TiO<sub>2</sub> nanosheets keep nearly the same as the pristine rutile nanorods. Additionally, the specific surface area of pristine anatase nanosheets is almost identical to that of Nb (20 %)-TiO<sub>2</sub> nanosheets. Therefore, the effect of change in surface area on the photocatalytic activity should be marginal.

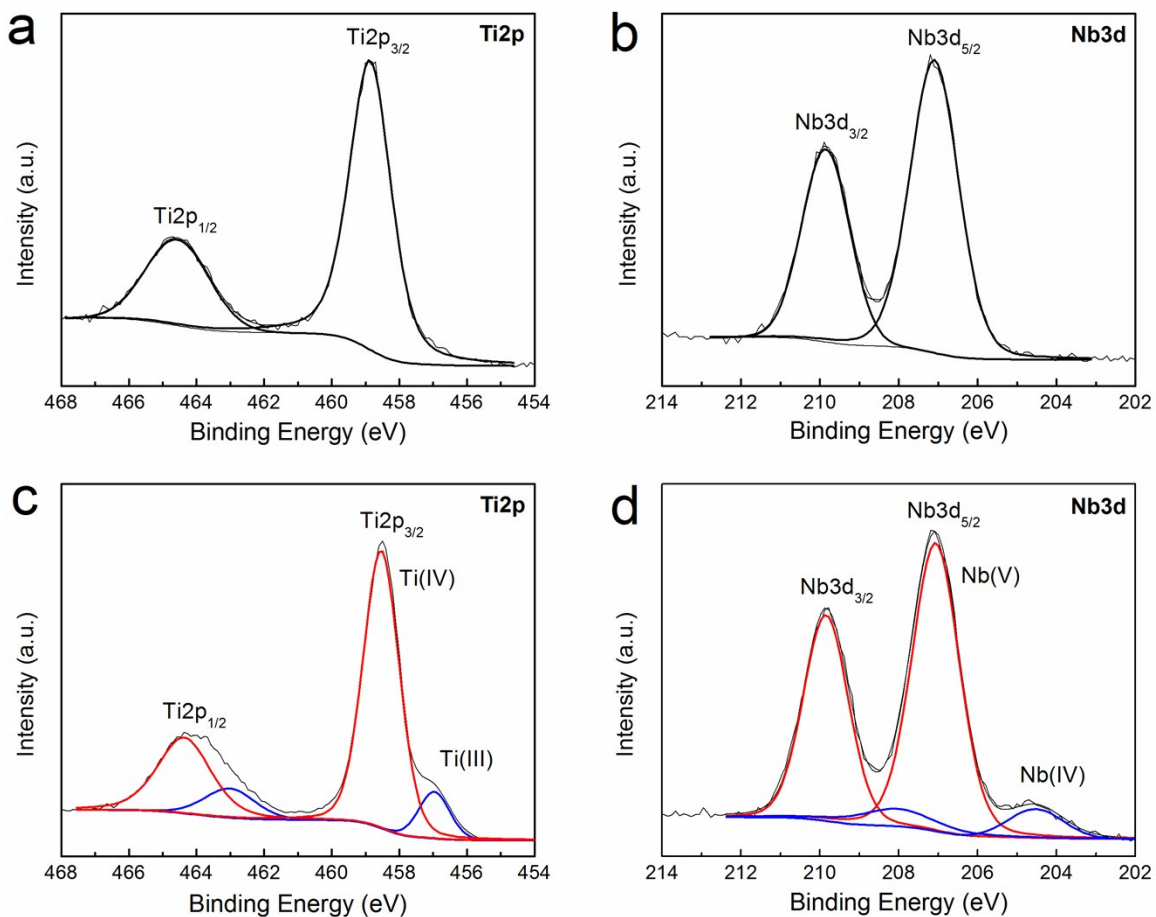

**Figure SI-7.** Elemental chemical states of Nb (20 %)-TiO<sub>2</sub> nanosheets. a,b) High-resolution XPS spectra of Ti2p and Nb3d. c,d) High-resolution XPS spectra of Ti2p and Nb3d after Ar<sup>+</sup> polishing for 30 min. The additional Ti<sup>3+</sup> and Nb<sup>4+</sup> signals could be detected as the result of charge compensation.



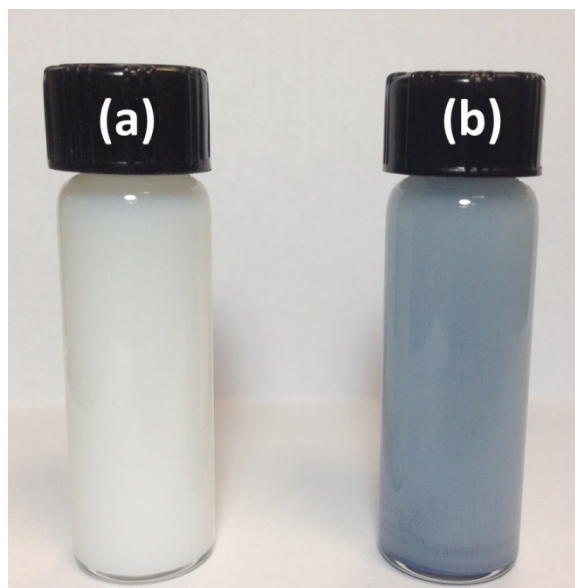

**Figure SI-8.** Digital photographs of a) pristine rutile  $\text{TiO}_2$  nanorods and b) anatase Nb (20 %)- $\text{TiO}_2$  nanosheets suspension.

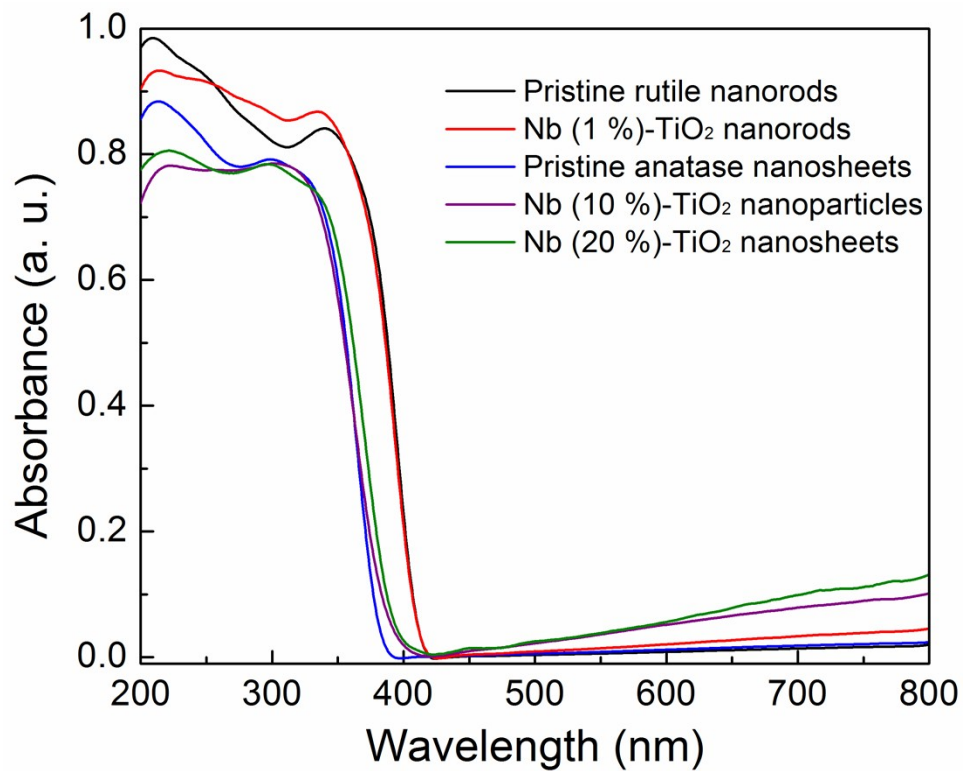

**Figure SI-9.** UV-vis diffuse reflectance spectra (DRS) of different TiO<sub>2</sub> samples.

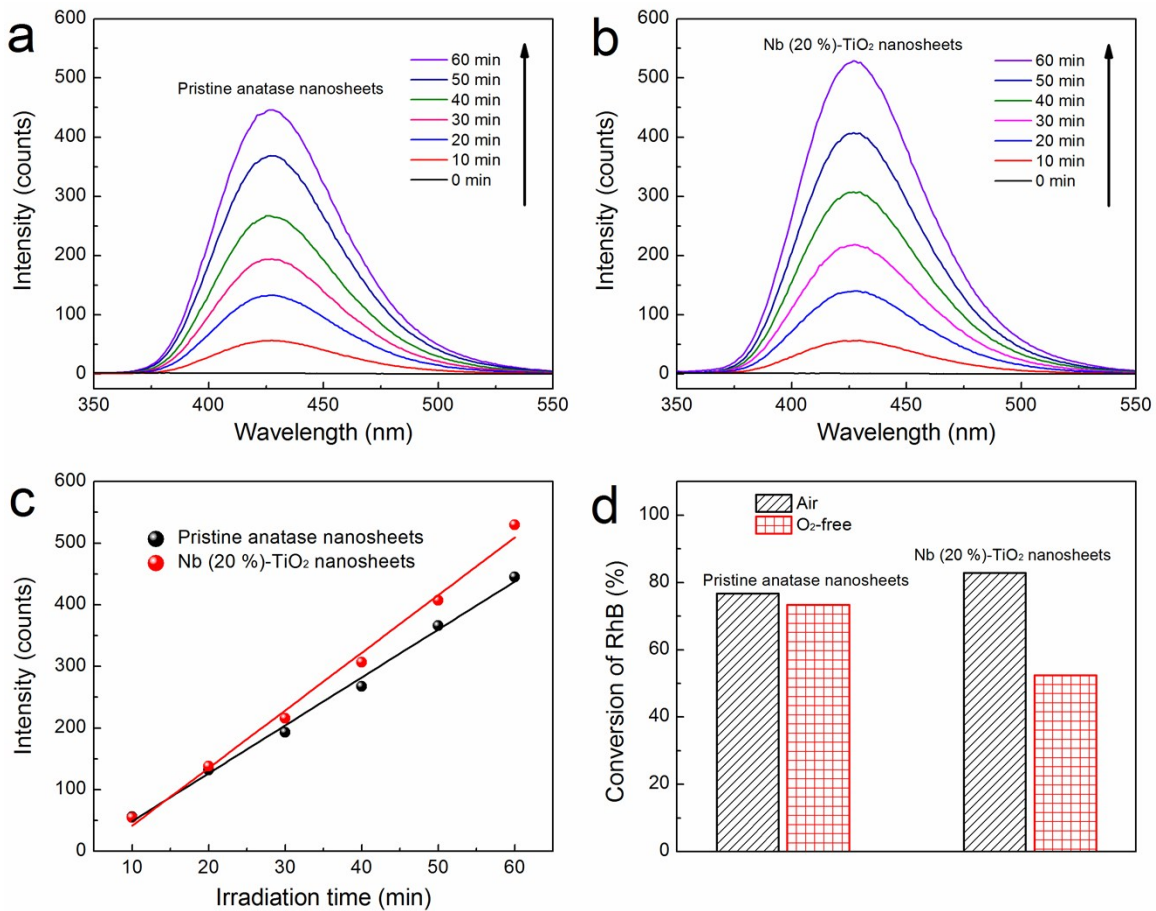

**Figure SI-10.**  $\cdot\text{OH}$ -trapping PL spectra of (a) pristine anatase nanosheets and b) anatase Nb (20 %)-TiO<sub>2</sub> nanosheets in an aqueous solution under UV light irradiation. c) Fluorescence intensity of luminol as a function of irradiation time for pristine anatase nanosheets and anatase Nb (20 %)-TiO<sub>2</sub> nanosheets. d) Comparison of photocatalytic performances between pristine anatase nanosheets and anatase Nb (20 %)-TiO<sub>2</sub> nanosheets at ambient conditions and in an anoxic environment (O<sub>2</sub>-free, argon saturated condition) under UV light illumination for 60 min.

## Adsorption of O<sub>2</sub> on pristine and Nb-doped TiO<sub>2</sub> surface

The adsorption of O<sub>2</sub> on rutile (011) and anatase (001) surfaces was calculated using density functional theory, which is implemented in *Vienna ab initio Simulation Package* (VASP) program. The electron-ion interaction is modeled by the projector-augmented wave (PAW) method. The Perdew-Burke-Ernzerhof form of generalized gradient approximation (GGA) was used for the exchange and correlation functional. The plane-wave cutoff energy was set to 520 eV. The Monkhost-Pack *k*-point sampling was tested to be  $3 \times 3 \times 1$ . We have tested various adsorption positions and found they converged to bridge (Ti/Nb at the middle of O-O bond) after relaxation. **Table SI-1** lists the adsorption energies. Obviously, O<sub>2</sub> prefers to adsorb on Nb site.

**Table SI-1.** Adsorption energies of O<sub>2</sub> on anatase (001) and rutile (011) surfaces

|                          | Anatase (001) |       | Rutile (011) |       |
|--------------------------|---------------|-------|--------------|-------|
|                          | Nb            | Ti    | Nb           | Ti    |
| E <sub>adsorb</sub> (eV) | -1.88         | -0.63 | -3.87        | -0.47 |
